# Supplementary material for: Potential of Vitamin D Food Fortification in Prevention of Cancer Deaths—A Modeling Study
Source: MDPI journal article supplement (doi:10.3390/nu13113986), 2021-11-09
Supplement: s1 [file s1]

**Table S1.** Further explanations on calculations of costs for vitamin D fortification of foods in Germany.

| Parameter                                                                          | Estimate     | Calculation details                                                                                                                                                                                                             | Reference                                                                |
|------------------------------------------------------------------------------------|--------------|---------------------------------------------------------------------------------------------------------------------------------------------------------------------------------------------------------------------------------|--------------------------------------------------------------------------|
| German population size                                                             | 83,100,000   | –                                                                                                                                                                                                                               | German Federal Statistical Office [1]                                    |
| Annual variable costs of food fortification with 800 IU per day per person         | 0.11 €       | –                                                                                                                                                                                                                               | Sandmann et al. 2015 [2]                                                 |
| Variable costs of food fortification with 800 IU per day for the German population | 9,141,000 €  | 0.11 € * 83,100,000                                                                                                                                                                                                             | Based on German Federal Statistical Office [1], Sandmann et al. 2015 [2] |
| Processing loss of vitamin D                                                       | 41%          | –                                                                                                                                                                                                                               | Sandmann et al. 2015 [2]                                                 |
| Total costs of food fortification with 800 IU per day for the German population    | 19,819,421 € | Annual variable costs (800 IU) * (1/(1-processing loss)) *(1/0.8)), where 1/0.8 represents +20% extra costs for marketing and education costs, food control and monitoring, other programme-specific recurrent production costs | Sandmann et al. 2015 [2]                                                 |
| Thereof total fixed costs                                                          | 10,512,221 € | Total costs of food fortification with 800 IU per day minus variable costs                                                                                                                                                      | Own calculation                                                          |
| Total costs of food fortification with 400 IU per day for the German population    | 15,165,821 € | Variable costs of food fortification with 800 IU per day / 800 * 400 + total fixed costs                                                                                                                                        | Own calculation                                                          |
| Total costs of food fortification with 600 IU per day for the German population    | 17,492,621 € | Variable costs of food fortification with 800 IU per day / 800 * 600 + total fixed costs                                                                                                                                        | Own calculation                                                          |
| Total costs of food fortification with 1000 IU per day for the German population   | 22,146,221 € | Variable costs of food fortification with 800 IU per day / 800 * 1000 + total fixed costs                                                                                                                                       | Own calculation                                                          |
| Variable costs of food fortification with 800 IU per day for the German population | 9,141,000 €  | 0.11 € * 83,100,000                                                                                                                                                                                                             | Based on German Federal Statistical Office [1], Sandmann et al. 2015 [2] |

Abbreviations: IU, International Units (40 IU = 1 µg).

**Table S2.** Main characteristics of randomized trials on vitamin D supplements (adapted from Autier et al. [3])

| Baseline serum 25-hydroxyvitamin D level (ng/ml) |                  |
|--------------------------------------------------|------------------|
| Median (Range)                                   | 18.1 (4.7–36.3 ) |
| No. of intervention groups with dose of          |                  |
| 200– <400 IU/d                                   | 8                |
| 400– <600 IU/d                                   | 18               |
| 600– <1000 IU/d                                  | 54               |
| 1000– <2000 IU/d                                 | 14               |
| 2000– <4000 IU/d                                 | 4                |
| ≥4000 IU/d                                       | 3                |
| No. of trials with median levels                 |                  |
| Dose of supplement (IU/d, Median (Range))        | 800 (200-10,000) |
| Follow-up (months) <sup>1</sup>                  |                  |
| Median                                           | 8.5              |
| Range                                            | 1–60             |

<sup>1</sup>Time from trial inception to blood draw for in-trial measurement of serum 25-hydroxyvitamin D.

## References

1. DESTATIS - Statistisches Bundesamt (German Federal Statistical Office). Bevölkerungsstand - Bevölkerung nach Nationalität und Geschlecht. Available online: <https://www.destatis.de/DE/Themen/Gesellschaft-Umwelt/Bevoelkerung/Bevoelkerungsstand/Tabellen/zensus-geschlecht-staatsangehoerigkeit-2021.html> (accessed on September 3).
2. Sandmann, A.; Amling, M.; Barvencik, F.; König, H.H.; Bleibler, F. Economic evaluation of vitamin D and calcium food fortification for fracture prevention in Germany. *Public Health Nutr* **2017**, *20*, 1874-1883, doi:10.1017/S1368980015003171.
3. Autier, P.; Gandini, S.; Mullie, P. A systematic review: influence of vitamin D supplementation on serum 25-hydroxyvitamin D concentration. *J Clin Endocrinol Metab* **2012**, *97*, 2606-2613, doi:10.1210/jc.2012-1238.
